# Supplementary material for: Poly(γ-glutamic acid) induced homogeneous mineralization of the poly(ethylene glycol)-co-2-hydroxyethyl methacrylate cryogel for potential application in bone tissue engineering
Source: Royal Society of Chemistry journal article supplement (doi:10.1039/c4ra15893h), 2015-01-01
Supplement: c4ra15893h1.pdf [file c4ra15893h1.pdf]

## Electronic Supplementary Information

### Poly( $\gamma$ -glutamic acid) induced homogeneous mineralization of the poly(ethylene glycol)-*co*-2-hydroxyethyl methacrylate cryogel for potential application in bone tissue engineering

Chuntao Liu,<sup>a</sup> Xin Liu,<sup>a,b</sup> Changyun Quan,<sup>a,b</sup> Xiaoqiong Li,<sup>a</sup> Chaozhu Chen,<sup>a</sup> Hua Kang,<sup>a</sup> Weikang Hu,<sup>a</sup> Qing Jiang<sup>a,b</sup> and Chao Zhang<sup>\*a,b</sup>

<sup>a</sup> School of Engineering, Sun Yat-sen University, Guangzhou, Guangdong 510006, China

<sup>b</sup> Guangdong Provincial Key Laboratory of Sensor Technology and Biomedical Instruments (Sun Yat-sen University), Guangzhou, Guangdong 510006, China

\*Corresponding Author:

Chao Zhang: Fax: +86-20-39332152; Tel: +86-20-39332145; E-mail: zhchao9@mail.sysu.edu.cn

Table S1. Properties of cryogels.

| mPGA (%) | Before mineralization           |                                  |                | After mineralization            |                                  |                |
|----------|---------------------------------|----------------------------------|----------------|---------------------------------|----------------------------------|----------------|
|          | Pore diameter ( $\mu\text{m}$ ) | Wall thickness ( $\mu\text{m}$ ) | EWC (%)        | Pore diameter ( $\mu\text{m}$ ) | Wall thickness ( $\mu\text{m}$ ) | EWC (%)        |
| 0        | 48.7 $\pm$ 25.0                 | 10.9 $\pm$ 7.9                   | 95.0 $\pm$ 0.3 | 43.2 $\pm$ 31.6                 | 15.2 $\pm$ 10.0                  | 93.0 $\pm$ 0.6 |
| 0.01     | 48.8 $\pm$ 28.2                 | 9.4 $\pm$ 5.9                    | 94.4 $\pm$ 0.2 | 41.1 $\pm$ 35.0                 | 19.3 $\pm$ 11.6                  | 93.3 $\pm$ 0.1 |
| 0.1      | 49.1 $\pm$ 25.7                 | 9.4 $\pm$ 5.5                    | 94.6 $\pm$ 0.4 | 28.7 $\pm$ 27.7                 | 18.1 $\pm$ 9.2                   | 93.1 $\pm$ 0.2 |
| 0.25     | 51.9 $\pm$ 29.2                 | 9.6 $\pm$ 6.3                    | 93.3 $\pm$ 0.5 | 35.0 $\pm$ 30.2                 | 15.3 $\pm$ 9.1                   | 92.0 $\pm$ 0.7 |
| 0.5      | 52.9 $\pm$ 32.9                 | 10.8 $\pm$ 6.8                   | 93.3 $\pm$ 0.8 | 31.8 $\pm$ 29.8                 | 11.9 $\pm$ 7.2                   | 91.7 $\pm$ 0.3 |

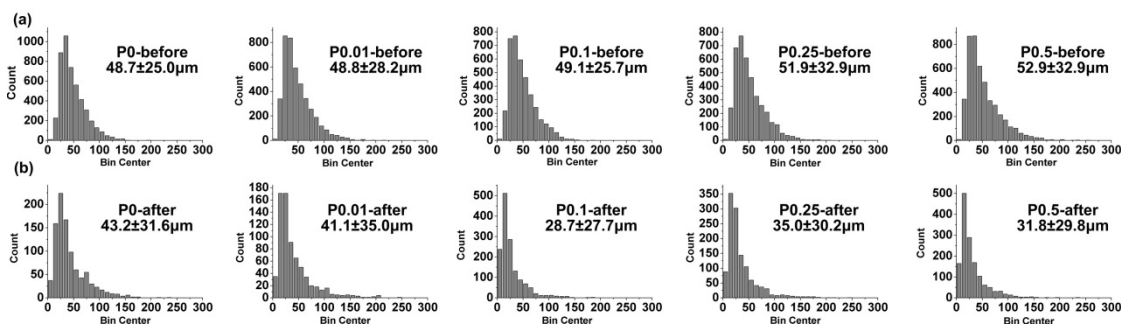

Fig. S1. Pore sizes distribution of cryogels with different concentration of mPGA before (a) and after (b) mineralization.

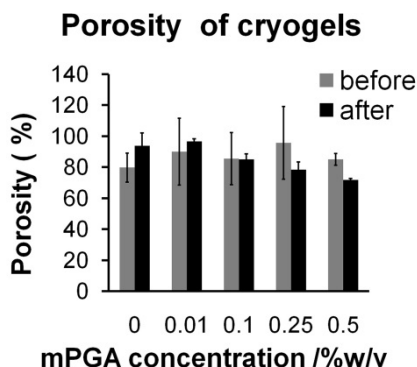

Fig. S2. Porosity of cryogels with different concentration of mPGA before (a) and after (b) mineralization.

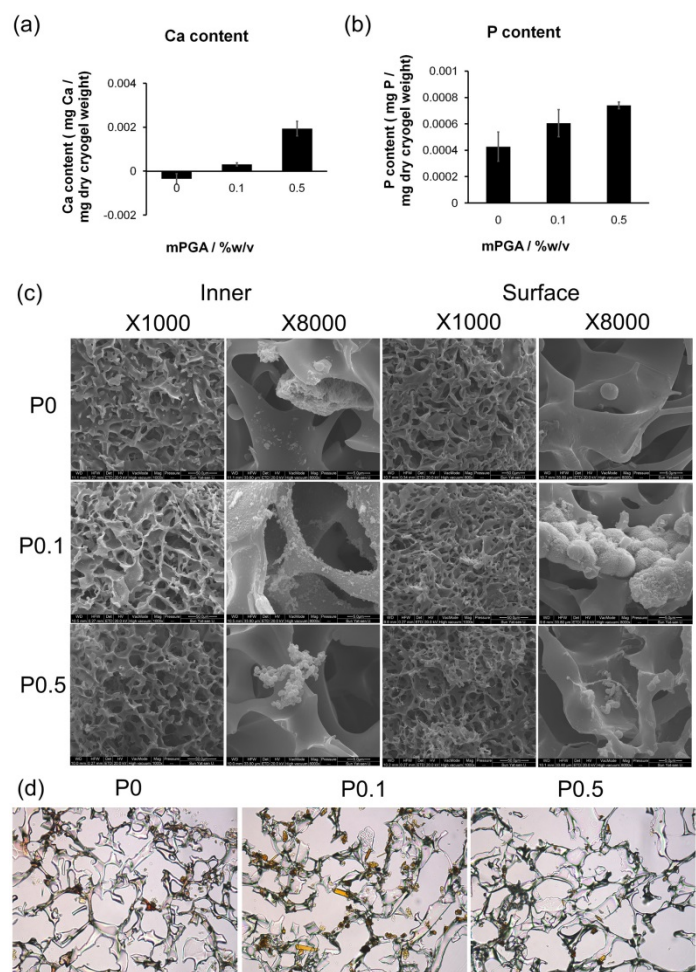

Fig. S3. (a) Ca & (b) P content in the cryogels after mineralization in SBF for 4 weeks. (c) SEM and (d) OM images (stained with alizarin red) of cryogels after mineralization in SBF for 4 weeks.
